# Supplementary material for: Association of health literacy and sleep problems with mental health of Chinese students in combined junior and senior high school
Source: PubMed Central journal article supplement (PMC6555521; doi:10.1371/journal.pone.0217685), 2019-06-07
Supplement: pone.0217685.s002.pdf [file pone.0217685.s002.pdf]

## Chinese Adolescent Interactive Health Literacy Questionnaire (CAIHLQ)

(Please select only one answer.)

| Have you had done these things?                                                                                          | Never and no desire | Never but with desire | Occasionally and irregularly | Often | Routinely |
|--------------------------------------------------------------------------------------------------------------------------|---------------------|-----------------------|------------------------------|-------|-----------|
| 1. Follow a planned exercise program.                                                                                    |                     |                       |                              |       |           |
| 2. Exercise vigorous intensity for accumulate at least 60 minutes physical activity daily.                               |                     |                       |                              |       |           |
| 3. Exercise moderate intensity for accumulate at least 60 minutes physical activity daily.                               |                     |                       |                              |       |           |
| 4. Check own pulse rate after exercising immediately.                                                                    |                     |                       |                              |       |           |
| 5. Get exercise during usual daily activities (such as using stairs instead of elevators, by bicycle instead of by bus). |                     |                       |                              |       |           |
| 6. Take part in leisure-time (recreational) physical activities (such as yoga, swimming, dancing).                       |                     |                       |                              |       |           |
| 7. Get along well with your family.                                                                                      |                     |                       |                              |       |           |
| 8. Maintain meaningful and fulfilling relationships with fiends or classmates.                                           |                     |                       |                              |       |           |
| 9. Show concern, love and warmth to others (such as friends, classmates, strangers).                                     |                     |                       |                              |       |           |
| 10. Get support from a network of caring people.                                                                         |                     |                       |                              |       |           |
| 11. Take times with your family or friends.                                                                              |                     |                       |                              |       |           |
| 12. Practice relaxation or meditation for 15-20 minutes daily.                                                           |                     |                       |                              |       |           |
| 13. Get enough sleep.                                                                                                    |                     |                       |                              |       |           |
| 14. Concentrate on pleasant thoughts at bedtime.                                                                         |                     |                       |                              |       |           |
| 15. Use specific methods to control your stress (such as music,                                                          |                     |                       |                              |       |           |

|                                                                                                                                                                            |  |  |  |  |  |
|----------------------------------------------------------------------------------------------------------------------------------------------------------------------------|--|--|--|--|--|
| sports, and pour forth your feeling to someone).                                                                                                                           |  |  |  |  |  |
| 16. Balance time between study and play.                                                                                                                                   |  |  |  |  |  |
| 17. Pace myself to prevent tiredness.                                                                                                                                      |  |  |  |  |  |
| 18. Have courage to challenge new things.                                                                                                                                  |  |  |  |  |  |
| 19. Work toward long-term goals in your life.                                                                                                                              |  |  |  |  |  |
| 20. Look forward to the future.                                                                                                                                            |  |  |  |  |  |
| 21. Feel each day is very meaningful.                                                                                                                                      |  |  |  |  |  |
| 22. Read or watch TV programs about improving health.                                                                                                                      |  |  |  |  |  |
| 23. Don't drink soft drinks.                                                                                                                                               |  |  |  |  |  |
| 24. Read labels to identify nutrients, fats, and sodium content in packaged food.                                                                                          |  |  |  |  |  |
| 25. Limit use of sugars and food continuing sugar.                                                                                                                         |  |  |  |  |  |
| 26. Eat western fast food no more than twice a month.                                                                                                                      |  |  |  |  |  |
| 27. Eat 80-100 gram of meet each day (equal to the size of adult's palm  )              |  |  |  |  |  |
| 28. Eat 200-400 gram of fresh fruit each day (equal to the size of adult's 2-3 fist  ). |  |  |  |  |  |
| 29. Eat 200-400 gram of vegetables each day (equal to the size of adult's 2-3 fist  ).  |  |  |  |  |  |
| 30. Eat 250-400 gram of cereal each day (equal to 3-4 small bowls of rice/noodle).                                                                                         |  |  |  |  |  |
| 31. Eat 2-3 servings of dairy products each day (equal to 250 ml of milk or 2 pieces of cheese).                                                                           |  |  |  |  |  |

## 中国青少年互动性健康素养评定量表

单选题，每题请选择一个答案。

| 你做过以下这些事情吗？                                  | 没做过也没想做 | 没做过但想做 | 做过但没有规律 | 经常这样做 | 一直都这样做 |
|----------------------------------------------|---------|--------|---------|-------|--------|
| 1. 有计划的进行体育锻炼                                |         |        |         |       |        |
| 2. 每天会做 60 分钟（时间可累计）高等强度的运动（如打篮球、跳绳、踢足球、赛跑等） |         |        |         |       |        |
| 3. 每天会做 60 分钟（时间可累计）中等强度的运动（如中速跑、快走、乒乓球等）    |         |        |         |       |        |
| 4. 运动后会立即自测脉搏                                |         |        |         |       |        |
| 5. 能够将运动融入于日常生活中（如走楼梯代替电梯、骑自行车代替坐车）          |         |        |         |       |        |
| 6. 参加娱乐类的体育项目（如健美操、舞蹈、瑜伽等）                   |         |        |         |       |        |
| 7. 能与家人和睦相处                                  |         |        |         |       |        |
| 8. 能与朋友或同学保持良好的人际关系                          |         |        |         |       |        |
| 9. 经常关心爱护、温暖他人（如同学、朋友、陌生人等）                  |         |        |         |       |        |
| 10. 当你遇到困难忧虑的事情时，能得到他人的帮助                    |         |        |         |       |        |
| 11. 会抽出时间与家人或朋友在一起                           |         |        |         |       |        |
| 12. 每天会抽出 15~20 分钟去放松心情、去散心或冥想               |         |        |         |       |        |
| 13. 能保证充足的（自我感觉）睡眠                           |         |        |         |       |        |
| 14. 每天入睡前想些愉快的事情                             |         |        |         |       |        |
| 15. 平时会做一些消除压力的事情（如运动、倾诉、听音乐等）               |         |        |         |       |        |
| 16. 能够平衡学习和业余娱乐的时间                           |         |        |         |       |        |
| 17. 生活中你会注意调节自己，防止疲劳                         |         |        |         |       |        |
| 18. 对新的事物勇于挑战                                |         |        |         |       |        |
| 19. 努力向着自己的人生目标前进                            |         |        |         |       |        |
| 20. 对自己的未来充满希望                               |         |        |         |       |        |
| 21. 每一天都感觉过得很有意义                             |         |        |         |       |        |

|                                                                                                                                 |  |  |  |  |  |
|---------------------------------------------------------------------------------------------------------------------------------|--|--|--|--|--|
| 22. 经常看关于提高健康的宣传和电视节目                                                                                                           |  |  |  |  |  |
| 23. 能做到不喝软饮料（如碳酸饮料、运动饮料、果汁饮料等）                                                                                                  |  |  |  |  |  |
| 24. 买包装食品时，注意看包装袋后的营养成分表，确认脂肪、盐分等含量                                                                                             |  |  |  |  |  |
| 25. 控制摄取糖分过多的食物（如奶油蛋糕、膨化食品、饮料等）                                                                                                 |  |  |  |  |  |
| 26. 每月吃西式快餐（如汉堡、薯条、炸鸡等）不超过2次                                                                                                    |  |  |  |  |  |
| 27. 每天都吃 80~110 克的肉类（相当于 1 个普通成年人的手掌心的大小及厚度  ) |  |  |  |  |  |
| 28. 每天都吃 200~400 克新鲜水果（相当 2~3 个普通成年人拳头大小  )    |  |  |  |  |  |
| 29. 每天都吃 200~400 克蔬菜（相当 2~3 个普通成年人拳头大小）                                                                                         |  |  |  |  |  |
| 30. 每天谷类（如米饭、面食等）都能吃 250~400 克（相当于 3~4 小碗米饭/面条或 3~4 个馒头）                                                                        |  |  |  |  |  |
| 31. 每天都喝 2~3 份乳制品（如牛奶、酸奶、奶酪等）（相当于 250 毫升牛奶/酸奶或 2 片奶酪）                                                                           |  |  |  |  |  |
